# Supplementary material for: Community-based psychosocial interventions for people with schizophrenia in low and middle-income countries: systematic review and meta-analysis
Source: Springer Nature journal article supplement (doi:10.1186/s12888-017-1516-7), 2017-10-30
Supplement: 12888_2017_1516_MOESM6_ESM.pdf [file 12888_2017_1516_MOESM6_ESM.pdf]

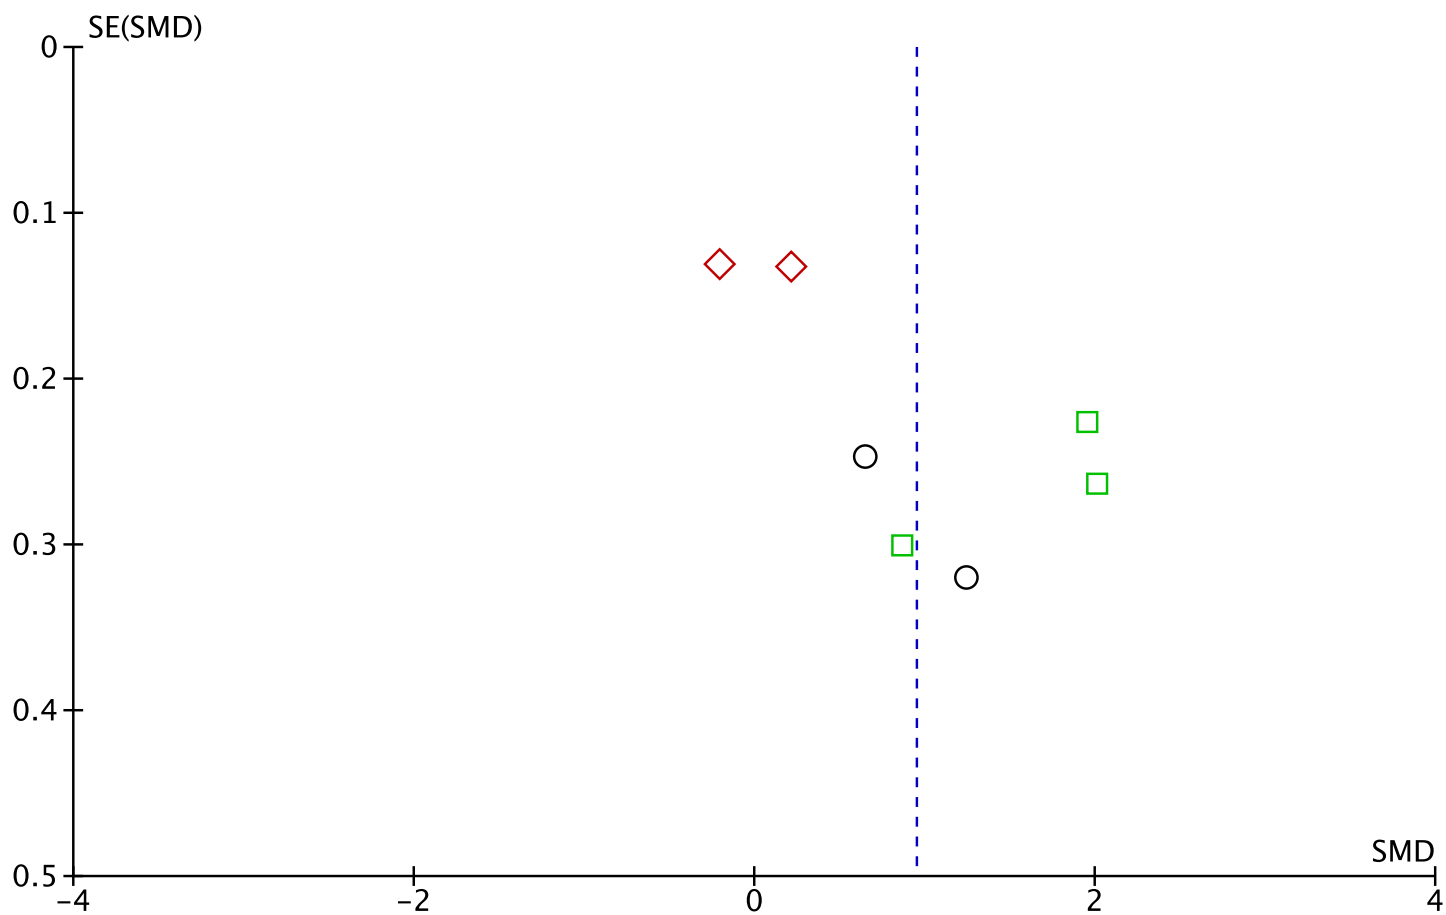

**Subgroups**

- Group A: Psychoeducation
- ◇ Group B: Multicomponent rehabilitation intervention
- Group C: Case management
